# Supplementary material for: Tracing genetic resurrection of pointing dog breeds: Cesky Fousek as both survivor and rescuer
Source: PubMed Central journal article supplement (PMC6709920; doi:10.1371/journal.pone.0221418), 2019-08-26
Supplement: pone.0221418.s001.pdf [file pone.0221418.s001.pdf]

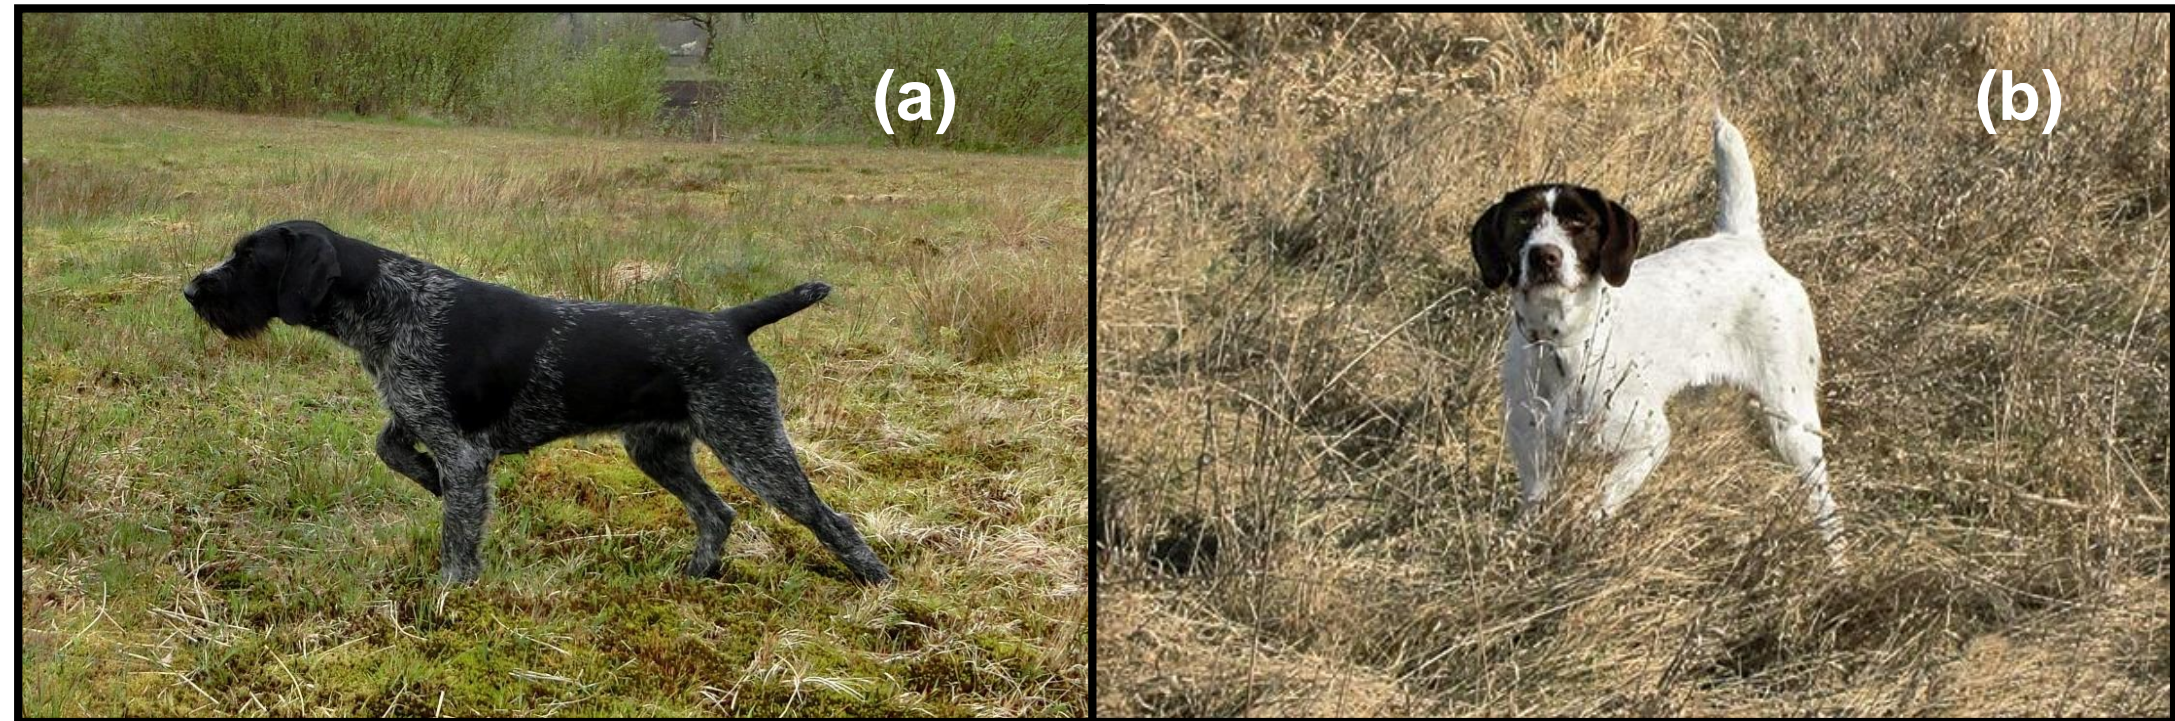

**S1 Fig.** *Example of high differentiation in coat color in two breeds of the same historical origin - (a) Deutsch Drahthaar; (b) German Wirehaired Pointer.*
