# Supplementary material for: Tracing genetic resurrection of pointing dog breeds: Cesky Fousek as both survivor and rescuer
Source: PubMed Central journal article supplement (PMC6709920; doi:10.1371/journal.pone.0221418), 2019-08-26
Supplement: pone.0221418.s005.pdf [file pone.0221418.s005.pdf]

**S2 Table.** Information about hunting breeds gathered from different scientific papers.

| <b>Breed</b>                | <b>n</b> | <b>H<sub>E</sub></b> | <b>H<sub>O</sub></b> | <b>N<sub>A</sub></b> | <b>F<sub>IS</sub></b> | <b>Ar</b> | <b>Author</b>               |
|-----------------------------|----------|----------------------|----------------------|----------------------|-----------------------|-----------|-----------------------------|
| German Wirehaired Pointer   | 50       | 0.71                 | 0.69                 | 6.94                 | nd                    | nd        | (DeNise et al., 2004)       |
|                             | 11       | 0.73                 | 0.72                 | 5.10                 | nd                    | nd        | (Pedersen et al., 2013)     |
| German Shorthaired Pointer  | 148      | 0.69                 | 0.68                 | 7.35                 | nd                    | nd        | (DeNise et al., 2004)       |
|                             | 30       | 0.70                 | 0.69                 | nd                   | 0.018                 | 5.4       | (Leroy et al., 2009)        |
|                             | 36       | 0.72                 | 0.71                 | 6.2                  | nd                    | nd        | (Pedersen et al., 2013)     |
| Wirehaired Pointing Griffon | 33       | 0.57                 | 0.62                 | 4.94                 | nd                    | nd        | (DeNise et al., 2004)       |
|                             | 27       | 0.69                 | 0.71                 | nd                   | -0.027                | 5.0       | (Leroy et al., 2009)        |
| Pointer                     | 50       | 0.68                 | nd                   | nd                   | nd                    | nd        | (Parra et al., 2008)        |
|                             | 20       | 0.62                 | 0.57                 | nd                   | 0.080                 | 4.8       | (Leroy et al., 2009)        |
|                             | 78       | 0.64                 | 0.60                 | 5.82                 | nd                    | nd        | (DeNise et al., 2004)       |
| English Setter              | 66       | 0.62                 | nd                   | nd                   | nd                    | nd        | (Parra et al., 2008)        |
|                             | 20       | 0.66                 | 0.64                 | nd                   | 0.027                 | 5.1       | (Leroy et al., 2009)        |
|                             | 125      | 0.48                 | 0.45                 | 5.29                 | nd                    | nd        | (DeNise et al., 2004)       |
| English Setter (show)       | 36       | 0.46                 | 0.43                 | 3.7                  | nd                    | nd        | (Pedersen et al., 2013)     |
| English Setter (field)      | 13       | 0.66                 | 0.69                 | 4.7                  | nd                    | nd        | (Pedersen et al., 2013)     |
| Irish Red White Setter      | 30       | 0.7                  | 0.65                 | nd                   | 0.069                 | 5.3       | (Leroy et al., 2009)        |
| Irish Setter                | 132      | 0.65                 | 0.63                 | 6.12                 | nd                    | nd        | (DeNise et al., 2004)       |
|                             | 17       | 0.63                 | 0.62                 | 4.8                  | nd                    | nd        | (Pedersen et al., 2013)     |
| Gordon Setter               | 149      | 0.57                 | 0.55                 | 5.18                 | nd                    | nd        | (DeNise et al., 2004)       |
| Vizsla                      | 116      | 0.68                 | 0.67                 | 6.00                 | nd                    | nd        | (DeNise et al., 2004)       |
| Weimaraner                  | 24       | 0.64                 | 0.66                 | nd                   | -0.033                | 4.3       | (Leroy et al., 2009)        |
|                             | 36       | 0.61                 | nd                   | nd                   | nd                    | nd        | (Irion et al., 2003)        |
|                             | 50       | 0.72                 | 0.65                 | 6.90                 | 0.059                 | nd        | (Streitberger et al., 2012) |
|                             | 88       | 0.54                 | 0.54                 | 5.24                 | nd                    | nd        | (DeNise et al., 2004)       |
| Labrador Retriever          | 16       | 0.56                 | 0.54                 | nd                   | 0.042                 | 3.3       | (Bjørnerfeldt et al., 2008) |
|                             | 22       | 0.60                 | 0.58                 | nd                   | 0.021                 | 4.4       | (Leroy et al., 2009)        |
|                             | 50       | 0.48                 | 0.35                 | 3.30                 | nd                    | nd        | (Zajc et al., 1997)         |
|                             | 52       | 0.66                 | 0.65                 | 5.76                 | nd                    | nd        | (DeNise et al., 2004)       |
|                             | 44       | 0.64                 | nd                   | nd                   | nd                    | nd        | (Irion et al., 2003)        |
| Bracco Italiano             | 72       | 0.64                 | 0.59                 | 6.43                 | 0.060                 | nd        | (Ciampolini et al., 2011)   |
| Brittany Spaniel            | 16       | 0.66                 | nd                   | nd                   | nd                    | nd        | (Parra et al., 2008)        |
|                             | 44       | 0.66                 | nd                   | nd                   | nd                    | nd        | (Irion et al., 2003)        |
|                             | 64       | 0.64                 | 0.64                 | 5.65                 | nd                    | nd        | (DeNise et al., 2004)       |
|                             | 30       | 0.68                 | 0.71                 | nd                   | -0.032                | 5.0       | (Leroy et al., 2009)        |
|                             | 72       | 0.65                 | 0.63                 | 6.50                 | nd                    | nd        | (Pedersen et al., 2013)     |
| Dachshunds                  | 632      | 0.74                 | 0.67                 | 7.60                 | 0.047                 | nd        | (Přibáňová et al.,          |

|               |     |      |      |      |        |    |                         |
|---------------|-----|------|------|------|--------|----|-------------------------|
|               |     |      |      |      |        |    | 2009)                   |
|               | 130 | 0.72 | 0.64 | 7.88 | nd     | nd | (DeNise et al., 2004)   |
| Hanover Hound | 92  | 0.66 | 0.67 | 6.44 | -0.012 | nd | (Lüpke and Distl, 2005) |

#### References:

- Björnerfeldt, S., Hailer, F., Nord, M., Vilà, C., 2008. Assortative mating and fragmentation within dog breeds. *BMC Evol. Biol.* 8, 28. <https://doi.org/10.1186/1471-2148-8-28>
- Ciampolini, R., Cecchi, F., Bramante, A., Casetti, F., Presciuttini, S., 2011. Genetic variability of the Bracco Italiano dog breed based on microsatellite polymorphism. *Ital. J. Anim. Sci.* 10, e59. <https://doi.org/10.4081/ijas.2011.e59>
- DeNise, S., Johnston, E., Halverson, J., Marshall, K., Rosenfeld, D., McKenna, S., Sharp, T., Edwards, J., 2004. Power of exclusion for parentage verification and probability of match for identity in American kennel club breeds using 17 canine microsatellite markers. *Anim. Genet.* 35, 14–17. <https://doi.org/10.1046/j.1365-2052.2003.01074.x>
- Irion, D.N., Schaffer, A.L., Famula, T.R., Eggleston, M.L., Hughes, S.S., Pedersen, N.C., 2003. Analysis of Genetic Variation in 28 Dog Breed Populations With 100 Microsatellite Markers. *J. Hered.* 94, 81–87. <https://doi.org/10.1093/jhered/esg004>
- Leroy, G., Verrier, E., Meriaux, J.C., Rognon, X., 2009. Genetic diversity of dog breeds: within-breed diversity comparing genealogical and molecular data. *Anim. Genet.* 40, 323–332. <https://doi.org/10.1111/j.1365-2052.2008.01842.x>
- Lüpke, L., Distl, O., 2005. Microsatellite marker analysis of the genetic variability in Hanoverian Hounds. *J. Anim. Breed. Genet.* 122, 131–139. <https://doi.org/10.1111/j.1439-0388.2005.00501.x>
- Parra, D., Méndez, S., Cañón, J., Dunner, S., 2008. Genetic differentiation in pointing dog breeds inferred from microsatellites and mitochondrial DNA sequence. *Anim. Genet.* 39, 1–7. <https://doi.org/10.1111/j.1365-2052.2007.01658.x>
- Pedersen, N., Liu, H., Theilen, G., Sacks, B., 2013. The effects of dog breed development on genetic diversity and the relative influences of performance and conformation breeding. *J. Anim. Breed. Genet.* 130, 236–248. <https://doi.org/10.1111/jbg.12017>
- Přibáňová, M., Horák, P., Schröffelová, D., Urban, T., Bechyňová, R., Musilová, L., 2009. Analysis of genetic variability in the Czech Dachshund population using microsatellite markers. *J. Anim. Breed. Genet.* 126, 311–318. <https://doi.org/10.1111/j.1439-0388.2008.00772.x>
- Streitberger, K., Schweizer, M., Kropatsch, R., Dekomien, G., Distl, O., Fischer, M.S., Epplen, J.T., Hertwig, S.T., 2012. Rapid genetic diversification within dog breeds as evidenced by a case study on Schnauzers. *Anim. Genet.* 43, 577–586. <https://doi.org/10.1111/j.1365-2052.2011.02300.x>
- Zajc, I., Mellersh, C.S., Sampson, J., 1997. Variability of canine microsatellites within and between different dog breeds. *Mamm. Genome* 8, 182–185. <https://doi.org/10.1007/s003359900386>
